# Supplementary material for: In Their Own Words: The Health and Sexuality of Immigrant Women with Infibulation Living in Switzerland
Source: Preprints.org preprint supplement (doi:10.20944/preprints201608.0170.v1), 2016-08-18
Supplement: Supplementary file 1 [file supplementary]

## Tables and figures

**Table 1: Recap of interviewed women**

| Name      | Age | Country of Origin | Marital status | N° children | Profession/ job                   | Education         | Age at FGM |
|-----------|-----|-------------------|----------------|-------------|-----------------------------------|-------------------|------------|
| Gabrielle | 24  | Somalia           | Married        | 3           | Unemployed                        | Unschoolled       | 8          |
| Jeanne    | 38  | Somalia           | Divorced       | 3           | Unemployed /interpreter           | Secondary         | 8          |
| Cindy     | 29  | Somalia           | Married        | 3           | Unemployed                        | Primary           | 7          |
| Fiona     | 32  | Somalia           | Couple         | 2           | Food service                      | Primary           | 10         |
| Anita     | 30  | Somalia           | Married        | 3           | Health care assistant/ Unemployed | Further education | 6          |
| Samya     | 27  | Ivory Coast       | Single         | 1           | Unemployed                        | Unschoolled       | 10         |
| Nadia     | 23  | Somalia           | Married        | 1           | Unemployed                        | Unschoolled       | 8          |
| Zoé       | 28  | Somalia           | Married        | 2           | Unemployed                        | Unschoolled       | 4          |
